# Supplementary material
Source: PubMed Central journal article supplement (PMC3318108)
Supplement: cc1104_0767SD1.pdf [file cc1104_0767SD1.pdf]

**MicroRNA-143 is critical regulator of cell cycle activity in stem cells with co-overexpression of Akt and angiopoietin-1 *via* transcriptional regulation of Erk5/Cyclin D1 signaling**

Vien Khach Lai, *PhD.*, Muhammad Ashraf, *PhD*, Shujia Jiang, *MD, MS*; Khawaja Husnain Haider, *MPharm., PhD.*

**Supplementary Table-I: List of the primers.**

|                     |                                                                               |
|---------------------|-------------------------------------------------------------------------------|
| Rat GAPDH (457bp)   | forward=5'TTCTTGTGCAGTGCCAGCCTCGTC3'<br>reverse=5'TAGGAACACGGAAGGCCATGCCAG3'  |
| Human Akt (457bp)   | forward=5'TGGACCACTGTCATCGAACGCACC3'<br>reverse=5'CGTTGGCGTACTCCATGACAAAGC3'  |
| Human Ang-1 (378bp) | forward=5'CGGTGAATATTGGCTGGGGAATGAG3'<br>reverse=5'GTAGTGCCACTTTATCCCATTGAG3' |

**Supplementary Table-II: List of Primary and secondary antibodies used.**

| Antibody         | Supplier       | Secondary antibody     | Supplier      | Application |
|------------------|----------------|------------------------|---------------|-------------|
| Rabbit anti Akt  | Cell signaling | AF-488 anti-rabbit     | BD Pharmingen | IHC         |
| Mouse anti-Ang-1 | Sigma          | AF-546 goat-anti mouse | Invitrogen    | IHC         |

|                       |                 |                         |               |                |
|-----------------------|-----------------|-------------------------|---------------|----------------|
| anti pTh24 FOXO1      | Santa Cruz      | AF-546 goat anti rabbit | Invitrogen    | IHC            |
| pTh24 FOXO1           | Santa Cruz      | AF-546 goat anti rabbit | Invitrogen    | IHC            |
| anti-Cyclin D1        | Cell Signalling | AF-546 goat anti-rabbit | Invitrogen    | IHC            |
| anti-BrdU             | BD Bioscience   | AF-488 goat anti-mouse  | Invitrogen    | IHC            |
| anti-Ki67             | Abcam           | AF-488 goat anti-mouse  | Invitrogen    | IHC            |
| PE-Cy5 anti Rat CD45  | Abcam           |                         |               | Flow cytometry |
| FITC anti Rat CD29    | BD Pharmingen   |                         |               | Flow cytometry |
| FITC anti Rat CD90    | BD Pharmingen   |                         |               | Flow cytometry |
| FITC Isotype Control  | BD Pharmingen   |                         |               | Flow cytometry |
| Rabbit anti pAkt      | Cell Signaling  | HRP-Horse anti Rabbit   | GE Healthcare | WB             |
| Rabbit anti Total Akt | Cell Signaling  | HRP-Horse anti Rabbit   | GE Healthcare | WB             |
| Anti-Ang-1            | Sigma           | HRP-Horse anti Mouse    | GE Healthcare | WB             |
| Anti-Cyclin D1        | Cell Signaling  | HRP-Horse anti Rabbit   | GE Healthcare | WB             |
| Rabbit anti FOXO1     | Cell Signaling  | HRP-Horse anti Rabbit   | GE Healthcare | WB             |
| pSer256 FOXO1         | Cell Signaling  | HRP-Horse anti Rabbit   | GE Healthcare | WB             |

---

AF: AlexaFluor; HRP: Horseradish peroxidase; IHC: Immunohistochemistry, WB: Western Blot.
